# Supplementary material for: Title: ‘Hiding in Plain Sight’: A Qualitative Study of International Medical Graduates Returning to Their Home Country for Internal Medicine Residency
Source: Research Square preprint supplement (doi:10.21203/rs.3.rs-8585367/v1), 2026-02-11
Supplement: Supplementary file 1 [file 2c535c73115bac754f9a9dbc.docx]

**Appendix A. Interview and Focus Group Guide for C-IMG Residents**

1. Opener:
   1. Please tell me a bit about yourself, including your gender. Can you tell me where you are in residency now and a bit about your educational journey prior to residency?
2. Key question: As you look back on your first few months of residency what was the experience like for you?

-possible follow-up prompts include:

- 1. How has that changed over time?
  2. Were there any specific days or events that stand out in your mind? (Depending on answers, positive or negative, can prompt for the opposite)
     1. Tell me/us more about that experience
     2. What was it like for you?
     3. Were your attendings at the time aware that you were a C-IMG?
     4. Do you think your I-IMG or CMG colleagues had similar experiences?
  3. How do you think your experiences compare to that of your CMG colleagues?

1. Has there been a point in residency where you felt you had overcome any challenges that you have described?
   1. What do you think changed to make you feel this way?
   2. Were there any supports that you used to help you with this?
2. Did your institution have any specific support programs or orientation programs for international medical graduates or specifically for C-IMGs?
   1. Were they any good?
   2. What would have made them better?
3. Do you feel that as a C-IMG today (in present-time), there are any differences between you and your colleagues?
4. Reflecting back on what you have experienced, what advice would you give to a C-IMG:
   1. Prior to applying for residency?
   2. Prior to entering residency?
5. If you could provide feedback to the program where you did medical school:
   1. what would you ask them to change/improve?
   2. What would you suggest they keep?
6. If you could create a program at your university to help C-IMGs have an easier transition into Internal Medicine residency, what would you create?

Closing:

1. [Moderator provides a summary of the discussion]: Did I miss anything?
2. Do you have any final thoughts or reflections?

**Appendix B. Interview and Focus Group Guide Program Director (or Designated Faculty)**

1. **Opener:**
   1. To begin with, can you tell me a bit about yourself (please include your gender and University) and how long you have been at your University?
   2. How long have you been the program director?
2. **Program specific questions**
   1. In your program, approximately how many I-IMG and C-IMG do you accept/year?
   2. Do you have a sense of what countries/Universities your C-IMGs trained in?
   3. Does your institution/program have any support programs or orientation programs for IMGs?
   4. Are these also attended by C-IMGs?
      1. If not, do they have an alternative program?
   5. Have you noticed any patterns about these different programs?
3. **Experience with C-IMG questions**
   1. In addition to interacting with them in your capacity as program director, in what other roles do you have experience working with C-IMGs?
   2. Overall, how well do C-IMGs do in your program (possible prompts to follow depending on response)
      1. What do you think are the main challenges for C-IMGs transitioning into residency?
      2. What about in their first year/first few months?
      3. How long does it take them to catch up?
      4. Can you tell me about some of the unique challenges they face?
      5. How do they compare to I-IMGs or to Canadian trained residents?
      6. Do some face more challenges than others?
         1. If yes, what seems to lead to these differences?
         2. Are some stronger than others? What seems to lead to this difference?
      7. Once identified, what is your/your program’s approach to supporting a struggling C-IMG?
      8. In what ways, if any, has CBME changed things for the C-IMG experience?
4. **Supporting a Better Start**
   1. If you could talk with them in advance of applying to your program, what would you say to a prospective C-IMGs?
   2. When they start in your program, what advice do you give them/would like to give them?
   3. Has your program thought about providing any different supports than you currently offer to new C-IMGs?
      1. If no: If you could create a more supportive program for them, what would it include?

**Closing:**

1. [Moderator provides a summary of the discussion]
2. Is there anything that I didn’t ask you that you think is important for me to know about your experience working with C-IMGs?
3. Do you have any final thoughts or reflections?

**Appendix C. Excerpt of Reflexive Memo-ing**

| “The participant shared that their feeling of being ‘less than’ began after not being accepted into medical school on the first attempt, a sentiment echoed by other participants and C-IMGs I’ve encountered. While our research focuses on C-IMGs’ transition to residency, it’s clear that understanding their entire medical journey—shaped by early experiences—may be key to understanding their sense of self and its impact on their transition. I should revise the prompt from ‘tell me about your medical school’ to ‘tell me about your medical journey.” (Z.M, Oct 2023) |
| --- |
